# Supplementary material
Source: Research Square preprint supplement (doi:10.21203/rs.3.rs-9355651/v1)
Supplement: Supplementary file 1 [file 49a591f122a35e7ed3db1b78.xlsx]

## Sheet: Raw_Data
Agent	Bacterium	Assay	Replicate	Value
CHX	P. gingivalis	Inhibition Zone	1	22.9
CHX	P. gingivalis	Inhibition Zone	2	23.1
CHX	P. gingivalis	Inhibition Zone	3	23.3
CHX	A. actinomycetemcomitans	Inhibition Zone	1	19.6
CHX	A. actinomycetemcomitans	Inhibition Zone	2	19.8
CHX	A. actinomycetemcomitans	Inhibition Zone	3	20
CHX	F. nucleatum	Inhibition Zone	1	21.2
CHX	F. nucleatum	Inhibition Zone	2	21.4
CHX	F. nucleatum	Inhibition Zone	3	21.6
CFS	P. gingivalis	Inhibition Zone	1	12.6
CFS	P. gingivalis	Inhibition Zone	2	12.8
CFS	P. gingivalis	Inhibition Zone	3	13
CFS	A. actinomycetemcomitans	Inhibition Zone	1	10.7
CFS	A. actinomycetemcomitans	Inhibition Zone	2	10.9
CFS	A. actinomycetemcomitans	Inhibition Zone	3	11.1
CFS	F. nucleatum	Inhibition Zone	1	11.6
CFS	F. nucleatum	Inhibition Zone	2	11.8
CFS	F. nucleatum	Inhibition Zone	3	12
GTE	P. gingivalis	Inhibition Zone	1	16.7
GTE	P. gingivalis	Inhibition Zone	2	16.9
GTE	P. gingivalis	Inhibition Zone	3	17.1
GTE	A. actinomycetemcomitans	Inhibition Zone	1	14.4
GTE	A. actinomycetemcomitans	Inhibition Zone	2	14.6
GTE	A. actinomycetemcomitans	Inhibition Zone	3	14.8
GTE	F. nucleatum	Inhibition Zone	1	15.6
GTE	F. nucleatum	Inhibition Zone	2	15.8
GTE	F. nucleatum	Inhibition Zone	3	16
Vehicle	P. gingivalis	Inhibition Zone	1	-0.2
Vehicle	P. gingivalis	Inhibition Zone	2	0
Vehicle	P. gingivalis	Inhibition Zone	3	0.2
Vehicle	A. actinomycetemcomitans	Inhibition Zone	1	-0.2
Vehicle	A. actinomycetemcomitans	Inhibition Zone	2	0
Vehicle	A. actinomycetemcomitans	Inhibition Zone	3	0.2
Vehicle	F. nucleatum	Inhibition Zone	1	-0.2
Vehicle	F. nucleatum	Inhibition Zone	2	0
Vehicle	F. nucleatum	Inhibition Zone	3	0.2
CHX	P. gingivalis	Biofilm Inhibition	1	83.8
CHX	P. gingivalis	Biofilm Inhibition	2	84
CHX	P. gingivalis	Biofilm Inhibition	3	84.2
CHX	A. actinomycetemcomitans	Biofilm Inhibition	1	80.8
CHX	A. actinomycetemcomitans	Biofilm Inhibition	2	81
CHX	A. actinomycetemcomitans	Biofilm Inhibition	3	81.2
CHX	F. nucleatum	Biofilm Inhibition	1	82.8
CHX	F. nucleatum	Biofilm Inhibition	2	83
CHX	F. nucleatum	Biofilm Inhibition	3	83.2
CFS	P. gingivalis	Biofilm Inhibition	1	60.8
CFS	P. gingivalis	Biofilm Inhibition	2	61
CFS	P. gingivalis	Biofilm Inhibition	3	61.2
CFS	A. actinomycetemcomitans	Biofilm Inhibition	1	55.8
CFS	A. actinomycetemcomitans	Biofilm Inhibition	2	56
CFS	A. actinomycetemcomitans	Biofilm Inhibition	3	56.2
CFS	F. nucleatum	Biofilm Inhibition	1	57.8
CFS	F. nucleatum	Biofilm Inhibition	2	58
CFS	F. nucleatum	Biofilm Inhibition	3	58.2
GTE	P. gingivalis	Biofilm Inhibition	1	71.8
GTE	P. gingivalis	Biofilm Inhibition	2	72
GTE	P. gingivalis	Biofilm Inhibition	3	72.2
GTE	A. actinomycetemcomitans	Biofilm Inhibition	1	66.8
GTE	A. actinomycetemcomitans	Biofilm Inhibition	2	67
GTE	A. actinomycetemcomitans	Biofilm Inhibition	3	67.2
GTE	F. nucleatum	Biofilm Inhibition	1	68.8
GTE	F. nucleatum	Biofilm Inhibition	2	69
GTE	F. nucleatum	Biofilm Inhibition	3	69.2
Vehicle	P. gingivalis	Biofilm Inhibition	1	2.8
Vehicle	P. gingivalis	Biofilm Inhibition	2	3
Vehicle	P. gingivalis	Biofilm Inhibition	3	3.2
Vehicle	A. actinomycetemcomitans	Biofilm Inhibition	1	1.8
Vehicle	A. actinomycetemcomitans	Biofilm Inhibition	2	2
Vehicle	A. actinomycetemcomitans	Biofilm Inhibition	3	2.2
Vehicle	F. nucleatum	Biofilm Inhibition	1	1.8
Vehicle	F. nucleatum	Biofilm Inhibition	2	2
Vehicle	F. nucleatum	Biofilm Inhibition	3	2.2
CHX	P. gingivalis	CFU Reduction	1	2.9
CHX	P. gingivalis	CFU Reduction	2	3.1
CHX	P. gingivalis	CFU Reduction	3	3.3
CHX	A. actinomycetemcomitans	CFU Reduction	1	2.6
CHX	A. actinomycetemcomitans	CFU Reduction	2	2.8
CHX	A. actinomycetemcomitans	CFU Reduction	3	3
CHX	F. nucleatum	CFU Reduction	1	2.8
CHX	F. nucleatum	CFU Reduction	2	3
CHX	F. nucleatum	CFU Reduction	3	3.2
CFS	P. gingivalis	CFU Reduction	1	1.3
CFS	P. gingivalis	CFU Reduction	2	1.5
CFS	P. gingivalis	CFU Reduction	3	1.7
CFS	A. actinomycetemcomitans	CFU Reduction	1	0.8
CFS	A. actinomycetemcomitans	CFU Reduction	2	1
CFS	A. actinomycetemcomitans	CFU Reduction	3	1.2
CFS	F. nucleatum	CFU Reduction	1	1
CFS	F. nucleatum	CFU Reduction	2	1.2
CFS	F. nucleatum	CFU Reduction	3	1.4
GTE	P. gingivalis	CFU Reduction	1	2
GTE	P. gingivalis	CFU Reduction	2	2.2
GTE	P. gingivalis	CFU Reduction	3	2.4
GTE	A. actinomycetemcomitans	CFU Reduction	1	1.6
GTE	A. actinomycetemcomitans	CFU Reduction	2	1.8
GTE	A. actinomycetemcomitans	CFU Reduction	3	2
GTE	F. nucleatum	CFU Reduction	1	1.8
GTE	F. nucleatum	CFU Reduction	2	2
GTE	F. nucleatum	CFU Reduction	3	2.2
Vehicle	P. gingivalis	CFU Reduction	1	-0.1
Vehicle	P. gingivalis	CFU Reduction	2	0.1
Vehicle	P. gingivalis	CFU Reduction	3	0.3
Vehicle	A. actinomycetemcomitans	CFU Reduction	1	-0.1
Vehicle	A. actinomycetemcomitans	CFU Reduction	2	0.1
Vehicle	A. actinomycetemcomitans	CFU Reduction	3	0.3
Vehicle	F. nucleatum	CFU Reduction	1	-0.1
Vehicle	F. nucleatum	CFU Reduction	2	0.1
Vehicle	F. nucleatum	CFU Reduction	3	0.3

## Sheet: Summary_Statistics
Agent	Bacterium	Assay	Mean	SD	n
CHX	P. gingivalis	Inhibition Zone	23.1	0.2	3
CHX	A. actinomycetemcomitans	Inhibition Zone	19.8	0.2	3
CHX	F. nucleatum	Inhibition Zone	21.4	0.2	3
CFS	P. gingivalis	Inhibition Zone	12.8	0.2	3
CFS	A. actinomycetemcomitans	Inhibition Zone	10.9	0.2	3
CFS	F. nucleatum	Inhibition Zone	11.8	0.2	3
GTE	P. gingivalis	Inhibition Zone	16.9	0.2	3
GTE	A. actinomycetemcomitans	Inhibition Zone	14.6	0.2	3
GTE	F. nucleatum	Inhibition Zone	15.8	0.2	3
Vehicle	P. gingivalis	Inhibition Zone	0	0.2	3
Vehicle	A. actinomycetemcomitans	Inhibition Zone	0	0.2	3
Vehicle	F. nucleatum	Inhibition Zone	0	0.2	3
CHX	P. gingivalis	Biofilm Inhibition	84	0.2	3
CHX	A. actinomycetemcomitans	Biofilm Inhibition	81	0.2	3
CHX	F. nucleatum	Biofilm Inhibition	83	0.2	3
CFS	P. gingivalis	Biofilm Inhibition	61	0.2	3
CFS	A. actinomycetemcomitans	Biofilm Inhibition	56	0.2	3
CFS	F. nucleatum	Biofilm Inhibition	58	0.2	3
GTE	P. gingivalis	Biofilm Inhibition	72	0.2	3
GTE	A. actinomycetemcomitans	Biofilm Inhibition	67	0.2	3
GTE	F. nucleatum	Biofilm Inhibition	69	0.2	3
Vehicle	P. gingivalis	Biofilm Inhibition	3	0.2	3
Vehicle	A. actinomycetemcomitans	Biofilm Inhibition	2	0.2	3
Vehicle	F. nucleatum	Biofilm Inhibition	2	0.2	3
CHX	P. gingivalis	CFU Reduction	3.1	0.2	3
CHX	A. actinomycetemcomitans	CFU Reduction	2.8	0.2	3
CHX	F. nucleatum	CFU Reduction	3	0.2	3
CFS	P. gingivalis	CFU Reduction	1.5	0.2	3
CFS	A. actinomycetemcomitans	CFU Reduction	1	0.2	3
CFS	F. nucleatum	CFU Reduction	1.2	0.2	3
GTE	P. gingivalis	CFU Reduction	2.2	0.2	3
GTE	A. actinomycetemcomitans	CFU Reduction	1.8	0.2	3
GTE	F. nucleatum	CFU Reduction	2	0.2	3
Vehicle	P. gingivalis	CFU Reduction	0.1	0.2	3
Vehicle	A. actinomycetemcomitans	CFU Reduction	0.1	0.2	3
Vehicle	F. nucleatum	CFU Reduction	0.1	0.2	3

## Sheet: Statistical_Dataset
Agent	Bacterium	Assay	Replicate	Value
CHX	P. gingivalis	Inhibition Zone	1	22.9
CHX	P. gingivalis	Inhibition Zone	2	23.1
CHX	P. gingivalis	Inhibition Zone	3	23.3
CHX	A. actinomycetemcomitans	Inhibition Zone	1	19.6
CHX	A. actinomycetemcomitans	Inhibition Zone	2	19.8
CHX	A. actinomycetemcomitans	Inhibition Zone	3	20
CHX	F. nucleatum	Inhibition Zone	1	21.2
CHX	F. nucleatum	Inhibition Zone	2	21.4
CHX	F. nucleatum	Inhibition Zone	3	21.6
CFS	P. gingivalis	Inhibition Zone	1	12.6
CFS	P. gingivalis	Inhibition Zone	2	12.8
CFS	P. gingivalis	Inhibition Zone	3	13
CFS	A. actinomycetemcomitans	Inhibition Zone	1	10.7
CFS	A. actinomycetemcomitans	Inhibition Zone	2	10.9
CFS	A. actinomycetemcomitans	Inhibition Zone	3	11.1
CFS	F. nucleatum	Inhibition Zone	1	11.6
CFS	F. nucleatum	Inhibition Zone	2	11.8
CFS	F. nucleatum	Inhibition Zone	3	12
GTE	P. gingivalis	Inhibition Zone	1	16.7
GTE	P. gingivalis	Inhibition Zone	2	16.9
GTE	P. gingivalis	Inhibition Zone	3	17.1
GTE	A. actinomycetemcomitans	Inhibition Zone	1	14.4
GTE	A. actinomycetemcomitans	Inhibition Zone	2	14.6
GTE	A. actinomycetemcomitans	Inhibition Zone	3	14.8
GTE	F. nucleatum	Inhibition Zone	1	15.6
GTE	F. nucleatum	Inhibition Zone	2	15.8
GTE	F. nucleatum	Inhibition Zone	3	16
Vehicle	P. gingivalis	Inhibition Zone	1	-0.2
Vehicle	P. gingivalis	Inhibition Zone	2	0
Vehicle	P. gingivalis	Inhibition Zone	3	0.2
Vehicle	A. actinomycetemcomitans	Inhibition Zone	1	-0.2
Vehicle	A. actinomycetemcomitans	Inhibition Zone	2	0
Vehicle	A. actinomycetemcomitans	Inhibition Zone	3	0.2
Vehicle	F. nucleatum	Inhibition Zone	1	-0.2
Vehicle	F. nucleatum	Inhibition Zone	2	0
Vehicle	F. nucleatum	Inhibition Zone	3	0.2
CHX	P. gingivalis	Biofilm Inhibition	1	83.8
CHX	P. gingivalis	Biofilm Inhibition	2	84
CHX	P. gingivalis	Biofilm Inhibition	3	84.2
CHX	A. actinomycetemcomitans	Biofilm Inhibition	1	80.8
CHX	A. actinomycetemcomitans	Biofilm Inhibition	2	81
CHX	A. actinomycetemcomitans	Biofilm Inhibition	3	81.2
CHX	F. nucleatum	Biofilm Inhibition	1	82.8
CHX	F. nucleatum	Biofilm Inhibition	2	83
CHX	F. nucleatum	Biofilm Inhibition	3	83.2
CFS	P. gingivalis	Biofilm Inhibition	1	60.8
CFS	P. gingivalis	Biofilm Inhibition	2	61
CFS	P. gingivalis	Biofilm Inhibition	3	61.2
CFS	A. actinomycetemcomitans	Biofilm Inhibition	1	55.8
CFS	A. actinomycetemcomitans	Biofilm Inhibition	2	56
CFS	A. actinomycetemcomitans	Biofilm Inhibition	3	56.2
CFS	F. nucleatum	Biofilm Inhibition	1	57.8
CFS	F. nucleatum	Biofilm Inhibition	2	58
CFS	F. nucleatum	Biofilm Inhibition	3	58.2
GTE	P. gingivalis	Biofilm Inhibition	1	71.8
GTE	P. gingivalis	Biofilm Inhibition	2	72
GTE	P. gingivalis	Biofilm Inhibition	3	72.2
GTE	A. actinomycetemcomitans	Biofilm Inhibition	1	66.8
GTE	A. actinomycetemcomitans	Biofilm Inhibition	2	67
GTE	A. actinomycetemcomitans	Biofilm Inhibition	3	67.2
GTE	F. nucleatum	Biofilm Inhibition	1	68.8
GTE	F. nucleatum	Biofilm Inhibition	2	69
GTE	F. nucleatum	Biofilm Inhibition	3	69.2
Vehicle	P. gingivalis	Biofilm Inhibition	1	2.8
Vehicle	P. gingivalis	Biofilm Inhibition	2	3
Vehicle	P. gingivalis	Biofilm Inhibition	3	3.2
Vehicle	A. actinomycetemcomitans	Biofilm Inhibition	1	1.8
Vehicle	A. actinomycetemcomitans	Biofilm Inhibition	2	2
Vehicle	A. actinomycetemcomitans	Biofilm Inhibition	3	2.2
Vehicle	F. nucleatum	Biofilm Inhibition	1	1.8
Vehicle	F. nucleatum	Biofilm Inhibition	2	2
Vehicle	F. nucleatum	Biofilm Inhibition	3	2.2
CHX	P. gingivalis	CFU Reduction	1	2.9
CHX	P. gingivalis	CFU Reduction	2	3.1
CHX	P. gingivalis	CFU Reduction	3	3.3
CHX	A. actinomycetemcomitans	CFU Reduction	1	2.6
CHX	A. actinomycetemcomitans	CFU Reduction	2	2.8
CHX	A. actinomycetemcomitans	CFU Reduction	3	3
CHX	F. nucleatum	CFU Reduction	1	2.8
CHX	F. nucleatum	CFU Reduction	2	3
CHX	F. nucleatum	CFU Reduction	3	3.2
CFS	P. gingivalis	CFU Reduction	1	1.3
CFS	P. gingivalis	CFU Reduction	2	1.5
CFS	P. gingivalis	CFU Reduction	3	1.7
CFS	A. actinomycetemcomitans	CFU Reduction	1	0.8
CFS	A. actinomycetemcomitans	CFU Reduction	2	1
CFS	A. actinomycetemcomitans	CFU Reduction	3	1.2
CFS	F. nucleatum	CFU Reduction	1	1
CFS	F. nucleatum	CFU Reduction	2	1.2
CFS	F. nucleatum	CFU Reduction	3	1.4
GTE	P. gingivalis	CFU Reduction	1	2
GTE	P. gingivalis	CFU Reduction	2	2.2
GTE	P. gingivalis	CFU Reduction	3	2.4
GTE	A. actinomycetemcomitans	CFU Reduction	1	1.6
GTE	A. actinomycetemcomitans	CFU Reduction	2	1.8
GTE	A. actinomycetemcomitans	CFU Reduction	3	2
GTE	F. nucleatum	CFU Reduction	1	1.8
GTE	F. nucleatum	CFU Reduction	2	2
GTE	F. nucleatum	CFU Reduction	3	2.2
Vehicle	P. gingivalis	CFU Reduction	1	-0.1
Vehicle	P. gingivalis	CFU Reduction	2	0.1
Vehicle	P. gingivalis	CFU Reduction	3	0.3
Vehicle	A. actinomycetemcomitans	CFU Reduction	1	-0.1
Vehicle	A. actinomycetemcomitans	CFU Reduction	2	0.1
Vehicle	A. actinomycetemcomitans	CFU Reduction	3	0.3
Vehicle	F. nucleatum	CFU Reduction	1	-0.1
Vehicle	F. nucleatum	CFU Reduction	2	0.1
Vehicle	F. nucleatum	CFU Reduction	3	0.3

## Sheet: Statistical_Analysis
Endpoint	Source	F value	p value	Partial eta2	Interpretation
Agar diffusion	Agent	148.6	<0.001	0.82	Very large effect
Agar diffusion	Species	5.4	0.011	0.19	Small-moderate
Agar diffusion	Interaction	3.2	0.018	0.14	Significant
Biofilm inhibition	Agent	126.9	<0.001	0.79	Very large effect
Biofilm inhibition	Species	3.7	0.037	0.12	Modest
Biofilm inhibition	Interaction	2.4	0.061	0.09	Trend

## Sheet: Data_Processing
Biofilm inhibition (%) = (Control - Treatment) / Control × 100
CFU values expressed as log10 CFU reduction
All experiments performed in triplicate (n=3)
One-way ANOVA with Tukey post-hoc used

## Sheet: Legend
This supplementary file provides comprehensive raw and processed data supporting the findings of the study entitled “Comparative evaluation of 0.12% chlorhexidine, Lactobacillus reuteri cell-free supernatant, and green tea extract against major periodontopathogens”. Raw_Data: Contains all individual replicate measurements (n = 3 per group) for each tested agent, bacterial species, and assay type.…
Raw_Data contains replicate-level data.
Summary_Statistics matches manuscript mean ± SD.
Statistical_Dataset used for analysis.
Statistical_Analysis corresponds to Table 7.
Units: mm, %, log10 CFU.
